# Supplementary material for: Early administration of fibrinogen concentrate is associated with improved survival among severe trauma patients: a single-centre propensity score-matched analysis
Source: World J Emerg Surg. 2020 Jan 14;15:7. doi: 10.1186/s13017-020-0291-9 (PMC6961302; doi:10.1186/s13017-020-0291-9)
Supplement: Supplementary file 1 — Additional file 1: Table S1. Characteristics of the propensity score matched patients with blunt trauma. Table S2. Characteristics of the propensity score matched patients with severe traumatic [file 13017_2020_291_MOESM1_ESM.xlsx]

## Sheet: Supplementary table 1.
Supplementary table 1. Characteristics of the propensity score matched patients with blunt trauma
	Control group n= 29	FC group n=29	Matched standardized difference	p-value
Age(years)	50 (36-71)	52 (32-74)	0.103	0.805
Gender, male	21 (72.4)	17 (58.6)	-0.293	0.005
Mechanism of the injury
Traffic accident (in the car)	7(24.1%)	11(37.9%)	0.302	0.231
Traffic accident (pedestrian)	11(37.9%)	10(34.5%)	-0.071
Fall	10(34.5%)	8(27.6%)	-0.149
Tumble	1(3.4%)	0(0.0%)	-0.265
Injury to the admission to the ED
0-30 (min)	5 (17.2%)	4 (13.8%)	-0.094	0.21
30-60 (min)	19 (65.5%)	18 (62.1%)	-0.007
60-90 (min)	4 (13.8%)	2 (6.9%)	-0.32
90- (min)	1 (3.4%)	5 (17.2%)	0.267
Revised trauma score	5.96 (4.09-6.90)	5.68 (4.09-6.08)	-0.174	<0.001
Probability of survival	0.721 (0.276-0.878)	0.724(0.275-0.886)	-0.103	<0.001
Vital signs on the admission to ED
Heart Rate ( /min)	84 (71-117)	100 (79-114)	-0.081	0.02
Glasgow coma scale	8 (4-14)	7 (4-13)	-0.122	0.019
Systolic Blood Pressure (mmHg)	110 (79-145)	100 (70-140)	0.126	0.032
Respiratory Rate(/min)	20 (16-24)	24 (17-30)	0.568	0.688
Injury severity score	30 (24-38)	29 (25-38)	0.004	0.001
Abbreviated injury scale
Head and neck	4 (0-4)	4 (0-5)	-1.079	0.135
Face	0 (0-0)	0 (0-1)	-0.039	0.64
Chest	3 (0-4)	3 (0-4)	-0.036	0.29
Abdomen	0 (0-2)	0 (0-2)	0.107	0.158
Extremity	1 (0-2)	2 (0-3)	-0.024	0.051
External	1 (0-1)	1 (0-1)	-0.046	0.179
Blood gas analysis
pH	7.32 (7.24 - 7.36)	7.25 (7.16 - 7.35)	-0.329	<0.001
Base deficit (mmol/L)	4.1 (2.1 - 6.5 )	6.3 (2.7 - 12.5)	-0.385	<0.001
Lactate (mmol/L)	4.1 (3.1-5.2)	5.0 (3.4- 7.9)	0.305	<0.001
Laboratory Data
Platelet (x103/μL)	208 (153-243)	193 (146-234)	0.167	0.811
PT-INR	1.13 (1.03-1.29)	1.22 (1.13-1.40)	0.208	<0.001
Fibrinogen (mg/dL)	1674 (124-202)	164 (138-222)	0.302	0.053
FDP (μg/mL)	105.9 (66.6 - 211.0)	99.5 (45.0 - 184.0)	0.102	0.383
D-dimer (μg/mL)	66.2 (42.0 - 122)	69.1 (29.1-125.0)	0.01	0.475
FC, fibrinogen concentrate; ED, emergency department; AIS, abbreviated injury scale; PT-INR, prothrombin time-international normalized ratio; FDP, fibrin/fibrinogen degradation products.

## Sheet: Supplementary table 2.
Supplementary table 2. Characteristics of the propensity score matched patients with severe traumatic brain injury
	Control group n= 20	FC group n=20	Matched standardized difference	p-value
Age(years)	46 (31-68)	63 (36-80)	-0.006	0.819
Gender, male	16(57.1)	12(42.9)	-0.704	0.002
Blunt trauma	19(95%)	20(100%)	0.244	0.375
Mechanism of the injury				0.591
Traffic accident (in the car)	18(25.7%)	8(29.6%)	0.087
Traffic accident (pedestrian)	22(31.4%)	11(40.7%)	0.195
Fall	22(31.4%)	8(29.6%)	-0.039
Tumble	6(8.6%)	0(0.0%)	-0.434
Stab wound	1(1.4%)	0(0.0%)	-0.169
Other	1(1.4%)	0(0.0%)	-0.169
Injury to the admission to the ED				0.067
0-30 (min)	3 (15.0%)	4 (20.0%)	0.507
30-60 (min)	16 (80.0%)	13 (65.0%)	-0.073
60-90 (min)	1(5.0%)	2 (10.0%)	-0.262
90- (min)	0 (0.0%)	1 (5.0%)	-0.295
Revised trauma score	5.23 (4.09-5.97)	5.20 (4.09-5.97)	-0.794	0.001
Probability of survival	0.668 (0.288-0.828)	0.577(0.238-0.786)	-0.822	0.001
Vital signs on the admission to ED
Heart Rate ( /min)	90 (69-107)	98 (80-115)	0.231	0.069
Glasgow coma scale	6 (3-9)	6 (3-8)	-0.627	0.009
Systolic Blood Pressure (mmHg)	133 (87-154)	118 (82-151)	-0.444	0.027
Respiratory Rate(/min)	20 (16-22)	24 (14-30)	0.312	0.278
Injury severity score	30 (25-38)	31 (25-40)	0.564	0.016
Abbreviated injury scale
Head and neck	4 (4-5)	5 (4-5)	0.16	0.324
Face	0 (0-0)	0 (0-2)	0.152	0.498
Chest	1 (0-3)	2 (0-4)	0.385	0.069
Abdomen	0 (0-2)	0 (0-1)	0.244	0.247
Extremity	1 (0-2)	2 (0-2)	0.633	0.005
External	1 (0-1)	1 (0-1)	0.244	0.302
Blood gas analysis
pH	7.33 (7.25 - 7.37)	7.26 (7.17 - 7.35)	-1.068	<0.001
Base deficit (mmol/L)	3.5 (2.0 - 6.6 )	6.4 (2.5 - 12.6)	-1.179	<0.001
Lactate (mmol/L)	3.8 (3.2-5.4)	4.5 (2.8- 7.3)	1.033	<0.001
Laboratory Data
Platelet (x103/μL)	219 (150-242)	203 (140-238)	0.294	0.174
PT-INR	1.05 (1.02-1.25)	1.19 (1.04-1.28)	0.573	0.002
Fibrinogen (mg/dL)	175 (157-204)	170 (138-248)	-0.352	0.111
FDP (μg/mL)	119.8 (75.6 - 215.0)	94.7 (43.4 - 346.5)	0.169	0.825
D-dimer (μg/mL)	70.3 (46.47 - 139.0)	57.2 (25.1-173.9)	0.109	0.917
FC, fibrinogen concentrate; ED, emergency department; AIS, abbreviated injury scale; PT-INR, prothrombin time-international normalized ratio; FDP, fibrin/fibrinogen degradation products.
